# Supplementary material
Source: PubMed Central journal article supplement (PMC5820722)
Supplement: jamainternmed-177-1735-s001.pdf [file jamainternmed-177-1735-s001.pdf]

## Supplementary Online Content

Tobias DK, Stuart JJ, Li S, et al. Association of a history of gestational diabetes and long-term cardiovascular disease risk in a large prospective cohort of US women. *JAMA Intern Med*. Published online October 16, 2017. doi:10.1001/jamainternmed.2017.2790

**eFigure.** Cumulative incidence of cardiovascular disease according to history of gestational diabetes mellitus

This supplementary material has been provided by the authors to give readers additional information about their work.

**eFigure. Cumulative incidence of cardiovascular disease according to history of gestational diabetes mellitus.**

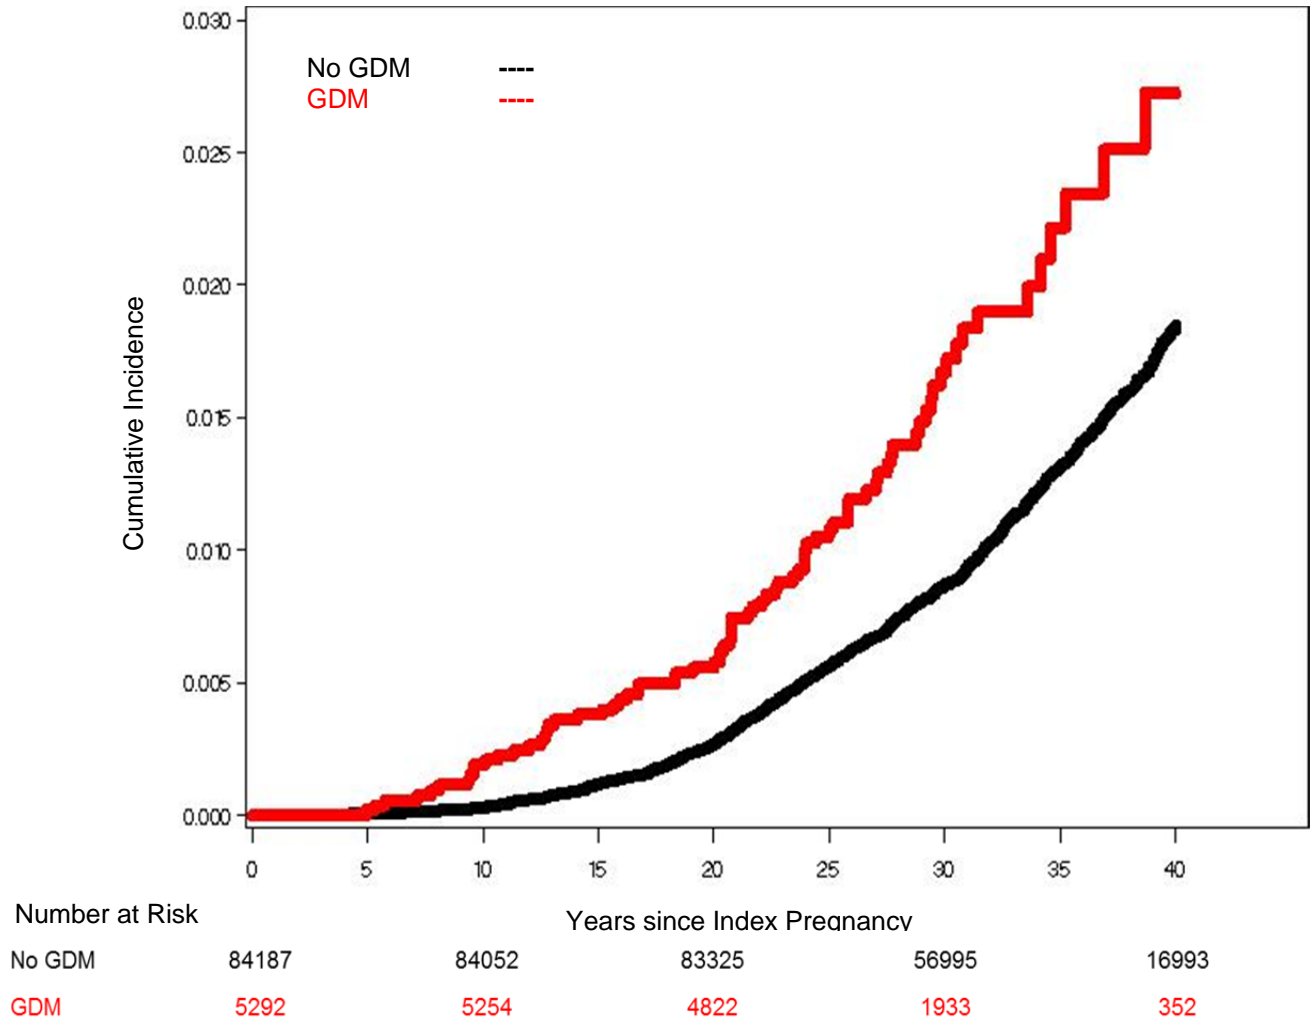

Cumulative incidence of confirmed cardiovascular disease events (myocardial infarction or stroke) by years since index pregnancy according to history of gestational diabetes mellitus, among 89,479 parous US women in the Nurses' Health Study II cohort, from 1989-2015.
